# Supplementary material
Source: Elsevier journal article supplement (https://www.sciencedirect.com/science/article/pii/S2173505020300479)
Supplement: mmc1 [file S2173505020300479:mmc1.docx]

**DEMENCIA Y EVENTOS SUICIDAS:**

**UN ESTUDIO META-ANALÍTICO**

**INFORMACIÓN**

**SUPLEMENTARIA**

Tabla de contenido

Tabla A1. RESULTADOS DEL ANÁLISIS DE META-REGRESIÓN DE VARIABLES CONTINUAS ESTUDIADAS EN RELACIÓN DEMENCIA – IDEACIÓN SUICIDA 3

Tabla A2. RESULTADOS DEL ANÁLISIS DE META-REGRESIÓN DE VARIABLES CATEGÓRICAS ESTUDIADAS EN RELACIÓN DEMENCIA – IDEACIÓN SUICIDA 4

Tabla A3. RESULTADOS DEL ANÁLISIS DE META-REGRESIÓN DE VARIABLES DE CALIDAD ESTUDIADAS EN RELACIÓN DEMENCIA – IDEACIÓN SUICIDA 5

Tabla A4. RESULTADOS DEL ANÁLISIS DE META-REGRESIÓN DE VARIABLES CONTINUAS ESTUDIADAS EN RELACIÓN DEMENCIA – INTENTO DE SUICIDIO 6

Tabla A5. RESULTADOS DEL ANÁLISIS DE META-REGRESIÓN DE VARIABLES CATEGÓRICAS ESTUDIADAS EN RELACIÓN DEMENCIA – INTENTO DE SUICIDIO 7

Tabla A6. RESULTADOS DEL ANÁLISIS DE META-REGRESIÓN DE VARIABLES DE CALIDAD ESTUDIADAS EN RELACIÓN DEMENCIA – INTENTO DE SUICIDIO 8

Tabla A7. RESULTADOS DEL ANÁLISIS DE META-REGRESIÓN DE VARIABLES CONTINUAS ESTUDIADAS EN RELACIÓN DEMENCIA – SUICIDIO CONSUMADO 9

Tabla A8. RESULTADOS DEL ANÁLISIS DE META-REGRESIÓN DE VARIABLES CATEGÓRICAS ESTUDIADAS EN RELACIÓN DEMENCIA – SUICIDIO CONSUMADO 10

Tabla A9. RESULTADOS DEL ANÁLISIS DE META-REGRESIÓN DE VARIABLES DE CALIDAD ESTUDIADAS EN RELACIÓN DEMENCIA – SUICIDIO CONSUMADO 11

# Tabla A1. RESULTADOS DEL ANÁLISIS DE META-REGRESIÓN DE VARIABLES CONTINUAS ESTUDIADAS EN RELACIÓN DEMENCIA – IDEACIÓN SUICIDA

| **Tabla A1: Demencia – Ideación Suicida. Resultados análisis de meta-regresión simple de las variables moderadoras continúas.** | | | | | | |
| --- | --- | --- | --- | --- | --- | --- |
| Predictor | *k* | *b*j | *F* | *P* | *Q*E | *R*2 |
| Año publicación | 16 | 0.027 | 1.096 | 0.313 | 83.759**** | 0 |
| Género del N total (% mujeres)  Edad media del N total (años)  DT de la edad del N total (años)  Género del N demencia (% mujeres)  Edad media del N demencia (años)  DT de la edad del N demencia (años) | 13  10  9  10  4  4 | 0.004  -0.037  -0.066  0.004  -0.046  0.142 | 0.201  0.633  0.141  0.388  22.453  1.127 | 0.663  0.449  0.718  0.551  0.040  0.399 | 68.077****  66.677****  67.986****  17.039*  1.242  4.597 | 0  0  0  0  0.99  0.21 |
| *k* = número de estudios. *b*j = coeficiente de regresión de cada predictor. *F* = estadístico para contrastar la significación de cada predictor (los grados de libertad para este estadístico son 1 en el numerador y *k* – 2 en el denominador. *p* = nivel de probabilidad del estadístico *F*. *Q*E = estadístico de contraste del error de especificación del modelo. *R*2 = proporción de varianza explicada por cada predictor. **** *p* < .0001. * *p* < .05 | | | | | | |

# Tabla A2. RESULTADOS DEL ANÁLISIS DE META-REGRESIÓN DE VARIABLES CATEGÓRICAS ESTUDIADAS EN RELACIÓN DEMENCIA – IDEACIÓN SUICIDA

| **Tabla A2. Demencia – Ideación Suicida. Resultados de los ANOVAs para las variables moderadoras categóricas.** | | | | | |
| --- | --- | --- | --- | --- | --- |
| **Predictor** | ***k*** | ***RV*+** | **95% IC** | | **Resultados ANOVA** |
| **Li** | **Ls** |
| ***Financiación***:  No se indica  Si se indica | 6  10 | 0.924  1.672 | 0.354  0.839 | 2.409  3.331 | *F*(1, 14) = 1.161, *p* = 0.300  *R*2 = 0.04  *Q*W(14) = 67.702, *p* < 0.001 |
| ***Conflicto intereses:***  No  Sí | 14  1 | 1.477  0.662 | 0.777  0.063 | 2.808  6.903 | *F*(1, 13) = 0.509, *p* = 0.488  *R*2 = 0  *Q*W(13) = 83.937, *p* < 0.001 |
| ***Tipo de muestra:***  Comunitaria  Clínica  Mixta | 8  6  2 | 1.299  1.325  1.729 | 0.535  0.490  0.359 | 3.153  3.581  8.314 | *F*(2, 13) = 0.062, *p =* 0.940  *R*2 = 0  *Q*W(13) = 83.717, *p* < 0.001 |
| ***Continente:***  Europa  N. América  S. América  Asia | 9  3  2  2 | 1.579  0.548  1.501  2.836 | 0.729  0.158  0.364  0.589 | 3.421  1.907  6.196  13.656 | *F*(3, 12) = 1.253, *p* = 0.334  *R*2 = 0.07  *Q*W(12) = 54.705, *p* < 0.001 |
| ***Medida Ideación:***  Entrevista clínica  Autoinforme  Mixto | 4  11  1 | 1.212  1.485  1.013 | 0.386  0.698  0.097 | 3.806  3.158  10.521 | *F*(2, 13) = 0.092, *p* = 0.913  *R*2 = 0  *Q*W(13) = 82.906, *p* < 0.001 |
| ***Diagnóstico Demencia:***  Clínico  Escalas/Tests  Mixto | 3  7  6 | 4.945  0.933  1.117 | 1.593  0.428  0.539 | 15.353  2.031  2.315 | *F*(2, 13) = 3.749, *p* = 0.052  *R*2 = 0.24  *Q*W(13) = 60.609, *p* < 0.001 |
| ***Diseño del estudio:***  Casos y Controles  Transversales  Longitudinal pros. | 5  7  4 | 1.901  1.255  1.029 | 0.675  0.496  0.322 | 5.356  3.173  3.298 | *F*(2, 13) = 0.395, *p* = 0.682  *R*2 = 0  *Q*W(13) = 84.396, *p* < 0.001 |
| ***Objetivo estudio***  ***Demencia-Suicidio***  No  Sí | 10  6 | 1.287  1.541 | 0.631  0.559 | 2.624  4.241 | F(1, 14) = 0.097, p = 0.760  *R*2 = 0  *Q*W (14) = 82.987, p < 0.001 |
| ***Medida TE:***  Directa  Indirecta  Otras | 2  13  1 | 2.729  1.160  2.170 | 0.575  0.604  0.246 | 12.953  2.229  19.151 | *F*(2, 13) = 0.712, *p* = 0.509  *R*2 = 0  *Q*W(13) = 81.897, *p* < 0.001 |
| *k* = número de estudios. *RV*+ = tamaño del efecto medio. Li y Ls = Límites confidenciales inferior y superior al 95% para *RV*+. *F* = estadístico para contrastar la significación de cada predictor. *Q*W = estadístico de contraste del error de especificación del modelo. *R*2 = proporción de varianza explicada por cada predictor. | | | | | |

# Tabla A3. RESULTADOS DEL ANÁLISIS DE META-REGRESIÓN DE VARIABLES DE CALIDAD ESTUDIADAS EN RELACIÓN DEMENCIA – IDEACIÓN SUICIDA

| **Tabla A3. Demencia – Ideación Suicida. Resultados de los ANOVAs para los ítems de calidad de los estudios.** | | | | | |
| --- | --- | --- | --- | --- | --- |
| **Predictor** | ***k*** | ***RV*+** | **95% IC** | | **Resultados ANOVA** |
| **Li** | **Ls** |
| ***Cálculo previo TM:***  No  Sí | 13  2 | 1.256  2.498 | 0.645  0.523 | 2.447  11.937 | *F*(1, 13) = 0.763, *p* = 0.398  *R*2 = 0  *Q*W(13) = 76.486, *p* < 0.001 |
| ***Reclutamiento:***  No  Sí | 2  13 | 0.872  1.506 | 0.164  0.771 | 4.631  2.939 | *F*(1, 13) = 0.431, *p =* 0.523  *R*2 = 0  *Q*W(13) = 73.528, *p* < 0.001 |
| ***Grupo comparación adecuado***  No  Sí | 3  13 | 3.413  1.068 | 1.118  0.601 | 10.418  1.901 | *F*(1, 14) = 3.935, *p* = 0.067  *R*2 = 0.21  *Q*W(14) = 61.775, *p* < 0.001 |
| ***Instrumento medida apropiado***  No  Sí | 2  14 | 0.859  1.463 | 0.173  0.791 | 4.259  2.706 | *F*(1, 14) = 0.443, *p* = 0.516  *R*2 = 0  *Q*W(14) = 73.897, *p* < 0.001 |
| ***Evaluación:***  Independiente  Ninguna | 9  3 | 0.983  1.421 | 0.498 0.309 | 1.942  6.529 | *F*(1, 10) = 0.242, *p* = 0.634  *R*2 = 0  *Q*W(10) = 64.544, *p* < 0.001 |
| ***Se discuten las limitaciones:***  No  Sí | 4  11 | 2.584  1.068 | 0.899  0.533 | 7.418  2.140 | *F*(1, 13) = 2.284, *p* = 0.155  *R*2 = 0.07  *Q*W(13) = 84.771, *p* < 0.001 |
| *k* = número de estudios. *RV*+ = tamaño del efecto medio. Li y Ls = Límites confidenciales inferior y superior al 95% para *RV*+. *F* = estadístico para contrastar la significación de cada predictor. *Q*W = estadístico de contraste del error de especificación del modelo. *R*2 = proporción de varianza explicada por cada predictor. | | | | | |

# Tabla A4. RESULTADOS DEL ANÁLISIS DE META-REGRESIÓN DE VARIABLES CONTINUAS ESTUDIADAS EN RELACIÓN DEMENCIA – INTENTO DE SUICIDIO

| **Tabla A4. Demencia – Intentos Suicidas. Resultados análisis de meta-regresión simple de las variables moderadoras continuas.** | | | | | | |
| --- | --- | --- | --- | --- | --- | --- |
| Predictor | *k* | *b*j | *F* | *p* | *Q*E | *R*2 |
| Año publicación  Género del N total (% mujeres)  Edad media del N total (años)  DT de la edad del N total (años) | 12  12  9  7 | 0.029  0.002  -0.012  0.181 | 0.435  0.002  0.113  1.254 | 0.525  0.969  0.747  0.314 | 607.53****  563.91****  186.54****  27.417**** | 0  0  0  0.14 |
| *k* = número de estudios. *b*j = coeficiente de regresión de cada predictor. *F* = estadístico para contrastar la significación de cada predictor (los grados de libertad para este estadístico son 1 en el numerador y *k* – 2 en el denominador. *p* = nivel de probabilidad del estadístico *F*. *Q*E = estadístico de contraste del error de especificación del modelo. *R*2 = proporción de varianza explicada por cada predictor. **** *p* < .0001. * *p* < .05 | | | | | | |

# Tabla A5. RESULTADOS DEL ANÁLISIS DE META-REGRESIÓN DE VARIABLES CATEGÓRICAS ESTUDIADAS EN RELACIÓN DEMENCIA – INTENTO DE SUICIDIO

| **Tabla A5. Demencia – Intentos de Suicidio. Resultados de los ANOVAs para las variables moderadoras categóricas.** | | | | | |
| --- | --- | --- | --- | --- | --- |
| **Predictor** | ***k*** | ***RV*+** | **95% IC** | | **Resultados ANOVA** |
| **Li** | **Ls** |
| ***Financiación:***  No se indica  Si se indica | 3  9 | 1.312  2.725 | 0.273  1.051 | 6.316  7.069 | *F*(1, 10) = .785, *p* = 0.396  *R*2 = 0  *Q*W(10) = 631.874, *p* < 0.001 |
| ***Conflicto intereses:***  No  Sí | 11  1 | 2.195  2.644 | 0.897  0.175 | 5.369  40.013 | *F*(1, 10) = 0.021, *p* = 0.888  *R*2 = 0  *Q*W(10) = 633.588, *p* < 0.001 |
| ***Tipo de muestra:***  Clínica  Registro autopsias  Mixta | 10  1  1 | 1.706  8.383  9.889 | 0.734  0.734  0.484 | 3.964 95.722 201.885 | *F*(2, 9) = 1.639, *p =* 0.247  *R*2 = 0.12  *Q*W(9) = 288.39, *p* < 0.001 |
| ***Continente:***  Europa  N. América  Asia  Oceanía | 4  3  3  2 | 1.877  1.986  1.969  4.045 | 0.345  0.274  0.287  0.445 | 10.230  14.427  13.514  36.774 | *F*(3, 8) = 0.161, *p* = 0.920  *R*2 = 0  *Q*W(8) = 501.174, *p* < 0.001 |
| ***Medida Intentos de Suicidio:***  Entrevistas  Escalas  Registros  Mixto | 3  2  4  3 | 0.942  4.044  1.841  4.531 | 0.145  0.601  0.479  0.678 | 6.127  27.216  7.077  30.270 | *F*(3, 8) = .831, *p* = 0.513  *R*2 = 0.15  *Q*W(8) = 208.629, *p* < 0.001 |
| ***Diagnóstico Demencia:***  Clínico  Escalas/Tests  Otros procedimientos  Mixto | 7  2  2  1 | 2.211  4.043  3.456  0.269 | 0.749  0.719  0.623  0.021 | 6.523  22.747  29.181  3.389 | *F*(3, 8) = 1.561, *p* = 0.273  *R*2 = 0.18  *Q*W(8) = 549.77, *p* < 0.001 |
| ***Diseño del estudio:***  Casos y Controles  Cohortes  Transversal | 6  2  4 | 2.975  1.322  2.009 | 0.827  0.178  0.434 | 10.703  9.815  9.317 | *F*(2, 9) = 0.316, *p* = 0.737  *R*2 = 0  *Q*W(9) = 353.696, *p* < 0.001 |
| ***Objetivo estudio Demencia-Suicidio***  No  Sí | 8  4 | 3.045  1.178 | 1.182  0.298 | 7.840  4.659 | *F*(1, 10) = 1.608, *p* = 0.234  *R*2 = 0.15  *Q*W(10) = 521.294, *p* < 0.001 |
| ***Medida TE:***  Directa  Indirecta  Otras | 3  7  2 | 2.776  1.633  4.044 | 0.507  0.504  0.559 | 15.203  5.290  29.231 | *F*(2, 9) = 0.454, *p* = 0.649  *R*2 = 0  *Q*W(9) = 584.734, *p* < 0.001 |
| *k* = número de estudios. *RV*+ = tamaño del efecto medio. Li y Ls = Límites confidenciales inferior y superior al 95% para *RV*+. *F* = estadístico para contrastar la significación de cada predictor. *Q*W = estadístico de contraste del error de especificación del modelo. *R*2 = proporción de varianza explicada por cada predictor. | | | | | |

# Tabla A6. RESULTADOS DEL ANÁLISIS DE META-REGRESIÓN DE VARIABLES DE CALIDAD ESTUDIADAS EN RELACIÓN DEMENCIA – INTENTO DE SUICIDIO

| **Tabla A6. Demencia – Intentos de Suicidio. Resultados de los ANOVAs para los ítems de calidad de los estudios.** | | | | | |
| --- | --- | --- | --- | --- | --- |
| **Predictor** | ***k*** | ***RV*+** | **95% IC** | | **Resultados ANOVA** |
| **Li** | **Ls** |
| ***Cálculo previo TM:***  No  Sí | 8  4 | 1.903  2.883 | 0.652  0.753 | 5.550  11.033 | *F*(1, 10) = 0.291, *p* = 0.602  *R*2 = 0  *Q*W(10) = 524.69, *p* < 0.001 |
| ***Grupo comparación adecuado***  No  Sí | 3  9 | 2.850  2.023 | 0.599  0.743 | 13.557  5.506 | *F*(1, 10) = 0.170, *p* = 0.689  *R*2 = 0  *Q*W(10) = 552.44, *p* < 0.001 |
| ***Evaluación:***  Independiente  Ambas  Ninguna  No procede | 3  1  1  2 | 5.069  0.174  1.733  1.746 | 0.617  0.001  0.039  0.151 | 41.648  49.740  76.843  20.176 | *F*(3, 3) = 1.234, *p* = 0.433  *R*2 = 0  *Q*W(3) = 116.86, *p* < 0.001 |
| *k* = número de estudios. *RV*+ = tamaño del efecto medio. Li y Ls = Límites confidenciales inferior y superior al 95% para *RV*+. *F* = estadístico para contrastar la significación de cada predictor. *Q*W = estadístico de contraste del error de especificación del modelo. *R*2 = proporción de varianza explicada por cada predictor. | | | | | |

# Tabla A7. RESULTADOS DEL ANÁLISIS DE META-REGRESIÓN DE VARIABLES CONTINUAS ESTUDIADAS EN RELACIÓN DEMENCIA – SUICIDIO CONSUMADO

| **Tabla A7. Demencia – Suicidio Consumado. Resultados análisis de meta-regresión simple de las variables moderadoras continuas.** | | | | | | |
| --- | --- | --- | --- | --- | --- | --- |
| Predictor | *k* | *b*j | *F* | *p* | *Q*E | *R*2 |
| Año publicación  Género del N total (% mujeres)  Edad media del N total (años)  DT de la edad del N total (años)  Género del N demencia (% mujeres) | 19  19  12  9  7 | 0.069  -0.003  -0.024  0.005  -0.003 | 2.553  0.171  1.427  0.039  0.119 | 0.129  0.685  0.259  0.848  0.743 | 283.503****  388.260****  9.193  2.345  298.779**** | 0.08  0  0.29  0  0 |
| *k* = número de estudios. *b*j = coeficiente de regresión de cada predictor. *F* = estadístico para contrastar la significación de cada predictor (los grados de libertad para este estadístico son 1 en el numerador y *k* – 2 en el denominador. *p* = nivel de probabilidad del estadístico *F*. *Q*E = estadístico de contraste del error de especificación del modelo. *R*2 = proporción de varianza explicada por cada predictor. **** *p* < .0001. * *p* < .05 | | | | | | |

# Tabla A8. RESULTADOS DEL ANÁLISIS DE META-REGRESIÓN DE VARIABLES CATEGÓRICAS ESTUDIADAS EN RELACIÓN DEMENCIA – SUICIDIO CONSUMADO

| **Tabla A8. Demencia – Suicidio Consumado. Resultados de los ANOVAs para las variables moderadoras categóricas.** | | | | | |
| --- | --- | --- | --- | --- | --- |
| **Predictor** | ***k*** | ***RV*+** | **95% IC** | | **Resultados ANOVA** |
| **Li** | **Ls** |
| ***Financiación:***  No se indica  Si se indica | 3  16 | 1.097  1.302 | 0.207  0.748 | 5.824  2.268 | *F*(1, 17) = 0.042, *p* = 0.839  *R*2 = 0  *Q*W(17) = 407.036, *p* < 0.001 |
| ***Tipo de muestra:***  Comunitaria  Registro autopsias  Mixta | 2  11  6 | 5.379  0.866  1.635 | 1.731  0.492  0.709 | 16.718  1.524  3.776 | *F*(2, 16) = 4.842, *p =* 0.023  *R*2 = 0.35  *Q*W(16) = 207.450, *p* < 0.001 |
| ***Continente:***  Europa  N. América  S. América  Asia | 10  4  4  1 | 1.393  1.183  1.109  0.802 | 0.682  0.349  0.208  0.082 | 2.844  4.013  5.936  7.806 | *F*(3, 15) = 0.102, *p* = 0.958  *R*2 = 0  *Q*W(15) = 397.83, *p* < 0.001 |
| ***Medida S. Consumado:***  Registros  Mixto | 14  5 | 1.656  0.505 | 0.979  0.175 | 2.799  1.459 | *F*(1, 17) = 4.480, *p* = 0.049  *R*2 = 0.20  *Q*W(17) = 352.227, *p* < 0.001 |
| ***Diagnóstico Demencia:***  Clínico  Escalas/Tests  Otros procedimientos  Mixto | 9  1  3  6 | 1.807  3.857  1.779  0.582 | 0.931  0.081  0.501  0.237 | 3.506  184.939  6.313  1.428 | *F*(3, 15) = 1.800, *p* = 0.190  *R*2 = 0.17  *Q*W(15) = 340.582, *p* < 0.001 |
| ***Diseño del estudio:***  Casos y Controles  Transversales  Longitudinal pros. | 13  4  2 | 1.078  0.947  5.378 | 0.609  0.362  1.606 | 1.909  2.477  18.013 | *F*(2, 16) = 3.585, *p* = 0.052  *R*2 = 0.23  *Q*W(16) = 180.47, *p* < 0.001 |
| ***Objetivo estudio Demencia-Suicidio***  No  Sí | 12  7 | 1.222  1.371 | 0.624  0.588 | 2.394  3.196 | *F*(1, 17) = 0.050, *p* = 0.825  *R*2 = 0  *Q*W(17) = 367.14, *p* < 0.001 |
| ***Medida TE:***  Directa  Indirecta | 3  16 | 0.397  1.601 | 0.115  0.967 | 1.376  2.649 | *F*(1, 17) =4.812, *p* = 0.042  *R*2 = 0.22  *Q*W(17) = 351.091, *p* < 0.001 |
| *k* = número de estudios. *RV*+ = tamaño del efecto medio. Li y Ls = Límites confidenciales inferior y superior al 95% para *RV*+. *F* = estadístico para contrastar la significación de cada predictor. *Q*W = estadístico de contraste del error de especificación del modelo. *R*2 = proporción de varianza explicada por cada predictor. | | | | | |

# Tabla A9. RESULTADOS DEL ANÁLISIS DE META-REGRESIÓN DE VARIABLES DE CALIDAD ESTUDIADAS EN RELACIÓN DEMENCIA – SUICIDIO CONSUMADO

| **Tabla A9. Demencia – Suicidio Consumado. Resultados de los ANOVAs para los ítems de calidad de los estudios** | | | | | |
| --- | --- | --- | --- | --- | --- |
| **Predictor** | ***k*** | ***RV*+** | **95% IC** | | **Resultados ANOVA** |
| **Li** | **Ls** |
| ***Cálculo previo TM:***  No  Sí | 15  4 | 1.239  1.424 | 0.682  0.465 | 2.249  4.354 | *F*(1, 17) = 0.054, *p* = 0.820  *R*2 = 0  *Q*W(17) = 408.431, *p* < 0.001 |
| ***Reclutamiento:***  No  Sí | 3  16 | 0.899  1.371 | 0.247  0.776 | 3.274  2.424 | *F*(1, 17) = 0.397, *p =* 0.537  *R*2 = 0  *Q*W(17) = 252.983, *p* < 0.001 |
| ***Grupo comparación adecuado***  No  Sí | 2  17 | 0.986  1.332 | 0.238  0.758 | 4.092  2.342 | *F*(1, 17) = 0.172, *p* = 0.684  *R*2 = 0  *Q*W(17) = 254.736, *p* < 0.001 |
| ***Evaluación:***  Ciega  Independiente  Ambas | 1  5  2 | 0.840  0.409  0.863 | 0.198  0.195  0.481 | 3.569  0.863  1.548 | *F*(2, 5) = 2.142, *p* = 0.213  *R*2 = 0  *Q*W(5) = 2.952, *p* = 0.707 |
| ***Se discuten las limitaciones:***  No  Sí | 2  17 | 0.986  1.332 | 0.238  0.758 | 4.092  2.342 | *F*(1, 17) = 0.172, *p* = 0.684  *R*2 = 0  *Q*W(17) = 254.736, *p* < 0.001 |
| *k* = número de estudios. *RV*+ = tamaño del efecto medio. Li y Ls = Límites confidenciales inferior y superior al 95% para *RV*+. *F* = estadístico para contrastar la significación de cada predictor. *Q*W = estadístico de contraste del error de especificación del modelo. *R*2 = proporción de varianza explicada por cada predictor. | | | | | |
